# Supplementary material
Source: publisher figshare collection journal article supplement (https://geolsoc.figshare.com/ndownloader/files/35156117)
Supplement: Supplementary file 1 [file 35156117]

## Sheet: Sheet1
Results_export_1	Results_export_2	Results_export_3
Results of Monte Carlo unmixing model
wghtings applied to PDPs and CDFs
number of grains in each trial=	N/A
trials=	10000
percent accepted trials=	1
Cross-correlation cutoff=	0
Kuiper V value cutoff=	1
KS D value cutoff=	1
Cross-correlation	0.805 +/- 0.02				Total Percent Contributions
Sample Names	Relative Contribution	Standard Deviation	Percent		Coahuila	Maya
PC03/Coahuila	0.240984	0.153057	24.1		43.8	56.2
La Joya/Coahuila	0.19743	0.124431	19.7
Santa Rosa/Maya	0.300299	0.0885037	30
Baldy Granites/Maya	0.0307025	0.0257807	3.1
Baldy Seds/Maya	0.0706947	0.0573793	7.1
Chicxulub/Maya	0.128258	0.0411412	12.8
Macal Granites/Maya	0.0316311	0.0254363	3.2
Kuiper V value	0.105 +/- 0.008
Sample Names	Relative Contribution	Standard Deviation			Coahuila	Maya
PC03/Coahuila	0.304932	0.180156	30.5		50.5	49.6
La Joya/Coahuila	0.199738	0.128882	20
Santa Rosa/Maya	0.276651	0.0801107	27.7
Baldy Granites/Maya	0.0318028	0.0273718	3.2
Baldy Seds/Maya	0.0819002	0.0705244	8.2
Chicxulub/Maya	0.0604371	0.035576	6
Macal Granites/Maya	0.0445393	0.0361649	4.5
KS D value	0.066 +/- 0.008
Sample Names	Relative Contribution	Standard Deviation
PC03/Coahuila	0.351437	0.152413
La Joya/Coahuila	0.144656	0.101585
Santa Rosa/Maya	0.267928	0.0979953
Baldy Granites/Maya	0.0336497	0.0288438
Baldy Seds/Maya	0.0972033	0.0883977
Chicxulub/Maya	0.0562555	0.0362727
Macal Granites/Maya	0.0488707	0.0392653
